# Supplementary material for: Mechanistic study of the trans,cis,cis-[RuCl2(DMSO)2(H2O)2] complex photochemistry in aqueous solutions
Source: Royal Society of Chemistry journal article supplement (doi:10.1039/d0pp00178c), 2020-07-20
Supplement: d0pp00178c1.pdf [file d0pp00178c1.pdf]

## Electronic Supporting Information

to paper of A.A. Shushakov, S.G. Matveeva, I.P. Pozdnyakov, V.P. Grivin, V.F. Plyusnin, D.B.

Vasilchenko, A.A. Melnikov, S.V. Chekalin, E.M. Glebov

### Mechanistic Study of the *trans,cis,cis*-[RuCl<sub>2</sub>(DMSO)<sub>2</sub>(H<sub>2</sub>O)<sub>2</sub>] Complex Photochemistry in Aqueous Solutions

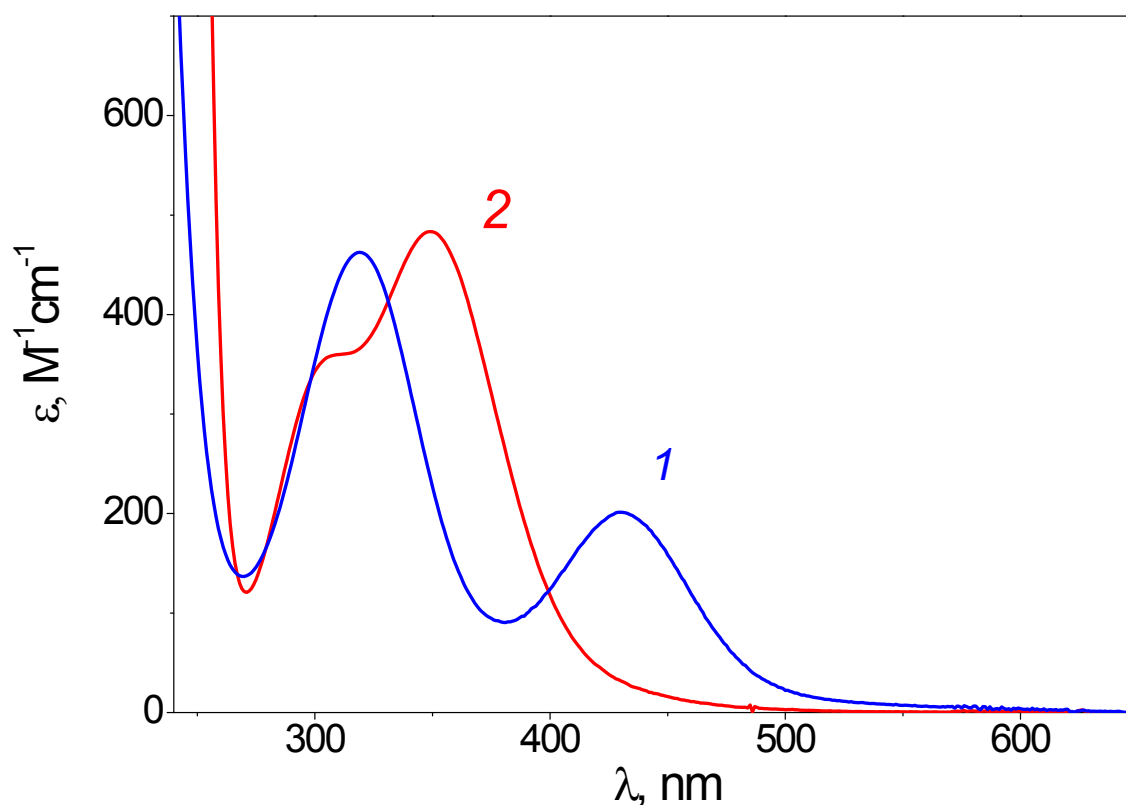

**Figure S1.** Electronic absorption spectra of *trans,cis,cis*-[RuCl<sub>2</sub>(DMSO)<sub>2</sub>(H<sub>2</sub>O)<sub>2</sub>] (**1a**, curve 1) and *cis,fac*-[RuCl<sub>2</sub>(DMSO)<sub>3</sub>(H<sub>2</sub>O)] (**2a**, curve 2) complexes in aqueous solutions.

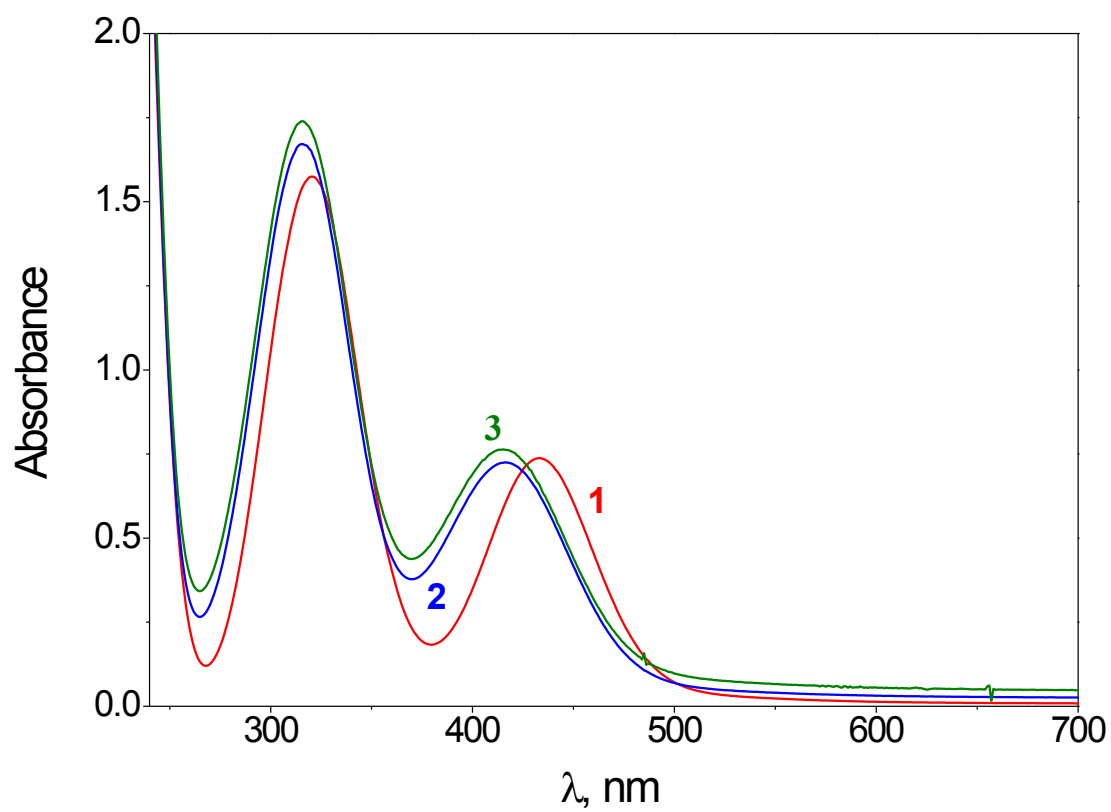

**Figure S2.** Changes in the electronic absorption spectra of **1a** in the course of thermal reaction (1 cm cell, concentration  $3.6 \times 10^{-3}$  M, temperature 295 K) in air-saturated aqueous solution. Curves 1-3 correspond to 0, 48, 120 hours in dark.

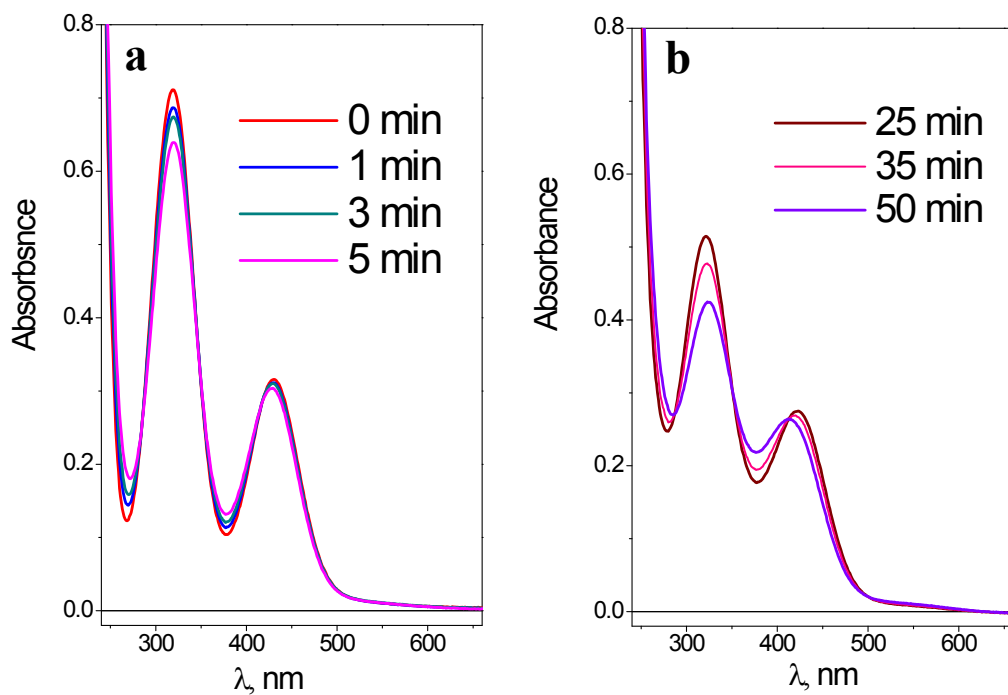

**Figure S3.** The change in the UV absorption spectra caused by irradiation (430 nm) of **1a** ( $1.2 \times 10^{-3}$  M in a 1 cm quartz cell) in argon-saturated aqueous solutions. **a** – initial stage of photolysis; **b** – deep photolysis.

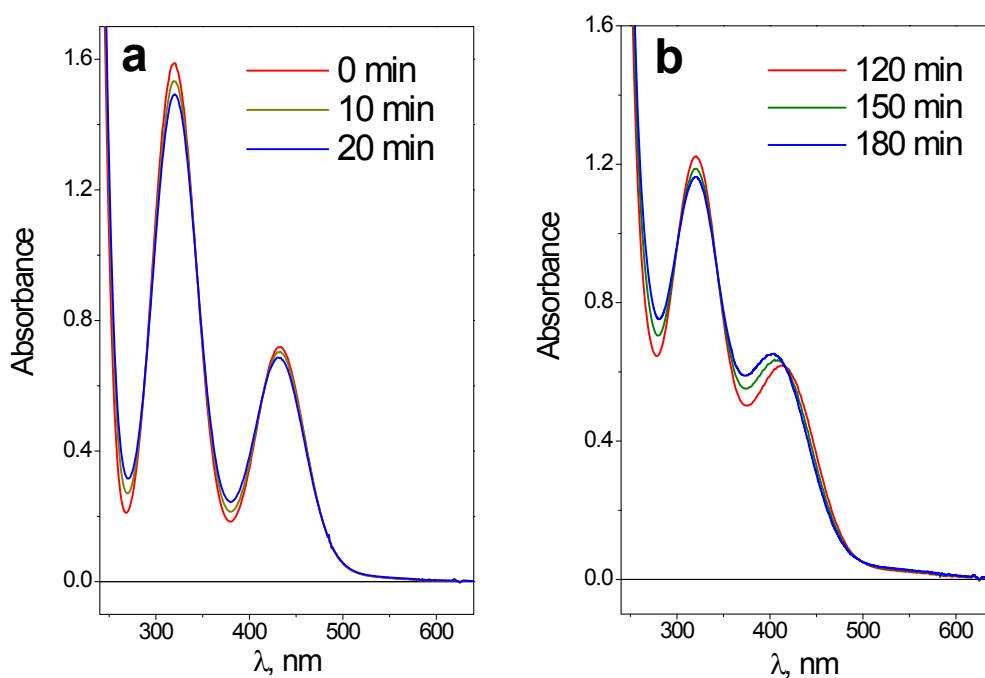

**Figure S4.** The change in the UV absorption spectra caused by irradiation (308 nm) of **1a** ( $2.6 \times 10^{-3}$  M in a 1 cm quartz cell) in argon-saturated aqueous solutions. **a** – initial stage of photolysis; **b** – deep photolysis.

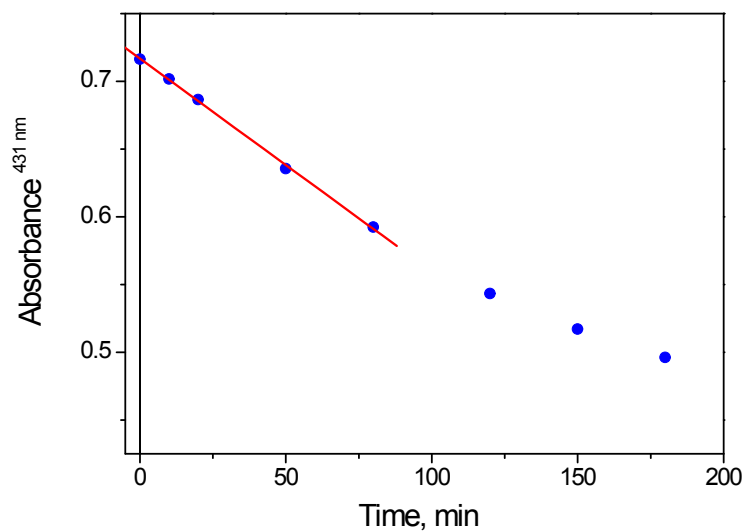

**Figure S5.** The change in absorption at 431 nm caused by irradiation (308 nm) of **1a** ( $2.6 \times 10^{-3}$  M in a 1 cm quartz cell) in argon-saturated aqueous solutions. Linear fit for the points corresponding to irradiation time  $\leq 80$  min.

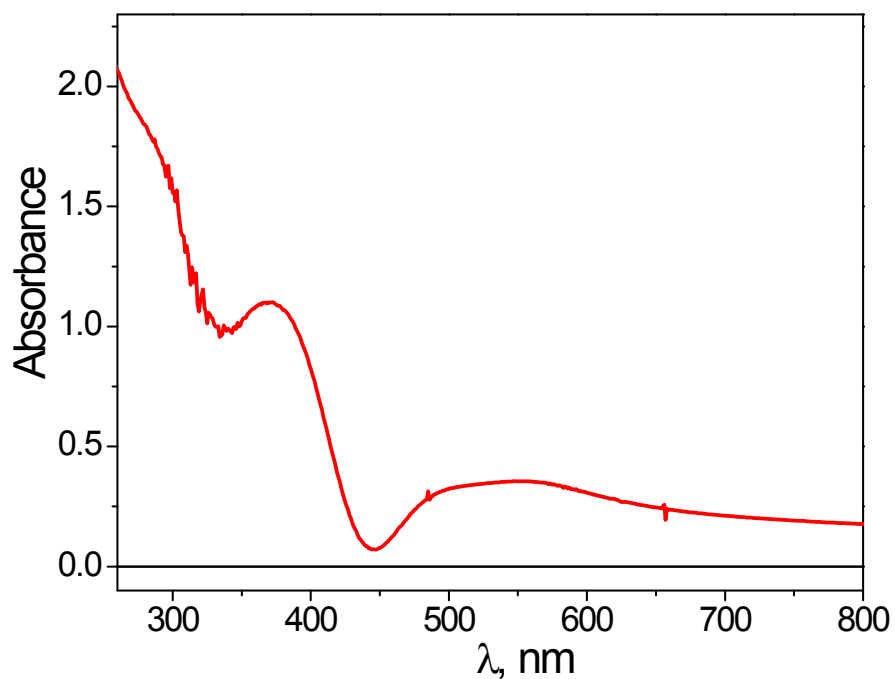

**Figure S6.** Differential absorption spectrum of **1a** ( $3.8 \times 10^{-3}$  M in a 1 cm cell) in air-saturated aqueous solution caused by irradiation at 308 nm. Difference in curves (Fig. 1A of the main text) corresponding to 150 min of irradiation and initial spectrum.

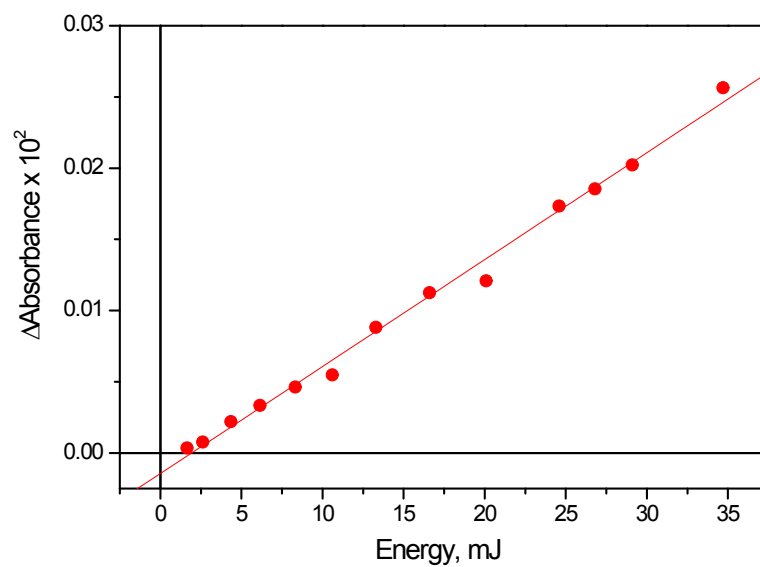

**Figure S7.** Laser flash photolysis (excitation at 355 nm, probing at 430 nm) of **1a** ( $2.7 \times 10^{-3}$  M in a 1 cm cell, argon-saturated aqueous solution). Initial absorption vs. exciting laser pulse energy. Experimental points and linear fit.
